# Supplementary material
Source: publisher figshare collection journal article supplement (https://asha.figshare.com/articles/dataset/_/12070824)
Supplement: Supplementary file 3 [file 1]

Supplemental material, Schmitt & Gillispie, “The Untapped Potential of Preschool Classroom Volunteers in Language–Literacy Instruction: A Feasibility Study,” *Perspectives of the ASHA Special Interest Groups*, [https://doi.org/10.1044/2020\\_PERSP-20-10002](https://doi.org/10.1044/2020_PERSP-20-10002)

**Supplemental Material S2.** Pretraining/Posttraining Survey.

| PRE & POST-TRAINING LANGUAGE & LITERACY SURVEY                                                                    |                   |          |         |       |                |
|-------------------------------------------------------------------------------------------------------------------|-------------------|----------|---------|-------|----------------|
| Fill in the circles for each question according to your level of agreement.                                       |                   |          |         |       |                |
| Questions                                                                                                         | Strongly Disagree | Disagree | Neutral | Agree | Strongly Agree |
| Story book readings can be used to teach children skills related to language and literacy.                        | ○                 | ○        | ○       | ○     | ○              |
| Preventative language and literacy instruction should be provided to all children living in at-risk environments. | ○                 | ○        | ○       | ○     | ○              |
| I feel confident in my knowledge of early language and literacy development.                                      | ○                 | ○        | ○       | ○     | ○              |
| I feel confident in my knowledge of skills related to language and literacy strategies.                           | ○                 | ○        | ○       | ○     | ○              |
| I feel confident in my ability to lead a small group (3-4 students) story book reading.                           | ○                 | ○        | ○       | ○     | ○              |
| I feel confident in my skills to teach language and literacy while reading a story book.                          | ○                 | ○        | ○       | ○     | ○              |
| I was trained by OB to support academic goals and objectives.                                                     | ○                 | ○        | ○       | ○     | ○              |
| Classroom teachers have taught/shown me how they want me to support the classroom.                                | ○                 | ○        | ○       | ○     | ○              |
| I am being utilized to my fullest potential as a classroom volunteer.                                             | ○                 | ○        | ○       | ○     | ○              |
