# Supplementary material
Source: publisher figshare collection journal article supplement (https://asha.figshare.com/articles/dataset/_/12070824)
Supplement: Supplementary file 4 [file 1]

**Supplemental Material S1. Demographic Questionnaire.**

## DEMOGRAPHIC INFORMATION

**Please fill in the following information.**

What is your age? \_\_\_\_\_

How long have you been volunteering at Operation Breakthrough? \_\_\_\_\_

Previous experience with children (Other than at OB) \_\_\_\_\_

❖ **Please circle your ethnicity (select all that apply).**

- White
- Hispanic or Latino
- Black or African American
- Native American or American Indian
- Asian / Pacific Islander
- Other \_\_\_\_\_

❖ **Please circle the highest degree or level of school you have completed. *If currently enrolled, circle the highest degree received.***

- Nursery school to 8<sup>th</sup> grade
- Some high school, no diploma
- High school graduate, diploma or the equivalent
- Some college credit
- Trade/technical/vocational training
- Associate degree
- Bachelor's degree
- Master's degree
- Professional degree
- Doctorate degree

❖ **Please circle your employment status (select all that apply).**

- Employed for wages
- Self-employed
- Out of work and looking for work
- Out of work but not currently looking for work
- A homemaker
- A student
- Military
- Retired
- Unable to work

❖ **In what capacities are you currently being used as a classroom volunteer? (select all that apply).**

- Assisting with story time
- Leading small groups
- Joining in with play time
- Completing administrative tasks
- Completing a cleaning task
- Assisting with classroom behaviors
- List others: \_\_\_\_\_
